# Supplementary material
Source: HighWire-hosted journal article supplement (https://jnm.snmjournals.org/highwire/filestream/94142/field_highwire_adjunct_files/0/81349_Supplemental_Data.pdf)
Supplement: 81349_Supplemental_Data.pdf [file 81349_Supplemental_Data.pdf]

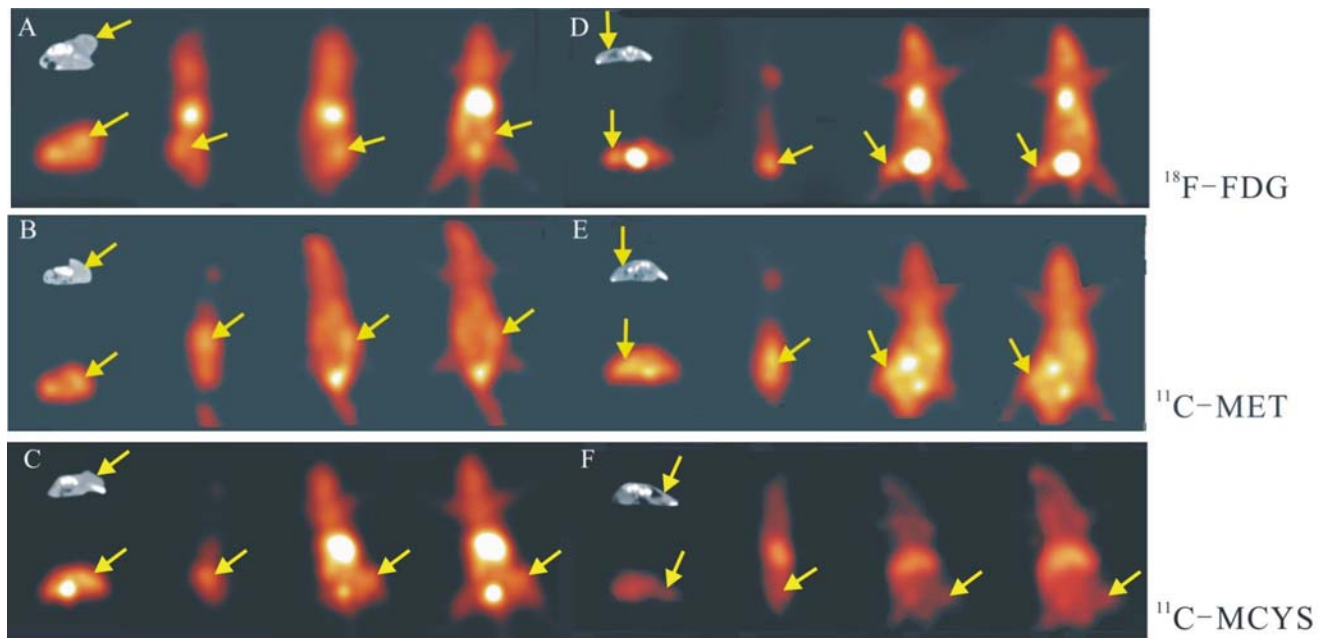

### SUPPLEMENTAL FIGURE 1.

Diagram of the fully automated system for the synthesis of  $^{11}\text{C}$ -MCYS.

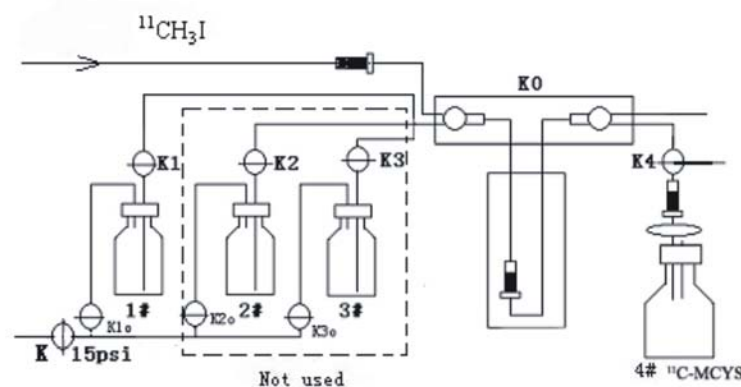

### SUPPLEMENTAL FIGURE 2.

Images in tumor-bearing mice (A, B, C) and inflammatory mice (D, E, F) obtained with  $^{18}\text{F}$ -FDG,  $^{11}\text{C}$ -MET and  $^{11}\text{C}$ -MCYS PET imaging, respectively. The five images in each picture (A-F) were CT (upper left), transaxial (lower left), sagittal (middle left), coronal (middle right) and maximum intensity projection (MIP, right) PET images, respectively. High  $^{18}\text{F}$ -FDG and  $^{11}\text{C}$ -MCYS uptake of tumor (A and C) and relatively low  $^{11}\text{C}$ -MET uptake of tumor (B) were observed, and tumor to muscle ratio was highest for  $^{11}\text{C}$ -MCYS uptake. Similarly, high  $^{18}\text{F}$ -FDG and  $^{11}\text{C}$ -MET uptake of inflammatory tissue (D and E) was also observed, however, low  $^{11}\text{C}$ -MCYS uptake of inflammatory tissue (F) was observed.
